# Supplementary material for: Comparison of FDG PET/CT and Bone Marrow Biopsy Results in Patients with Diffuse Large B Cell Lymphoma with Subgroup Analysis of PET Radiomics
Source: MDPI journal article supplement (doi:10.3390/diagnostics12010222), 2022-01-17
Supplement: s1 [file s1]

Table S1. The extracted radiomic features.

|                                                        |                                                                                                                                                                                                                                                                                                                                                                                                                                        |
|--------------------------------------------------------|----------------------------------------------------------------------------------------------------------------------------------------------------------------------------------------------------------------------------------------------------------------------------------------------------------------------------------------------------------------------------------------------------------------------------------------|
| Conventional (n=2)                                     | Mean standardized uptake value<br>Maximum standardized uptake value                                                                                                                                                                                                                                                                                                                                                                    |
| Histogram (n=4)                                        | Skewness<br>Kurtosis<br>Entropy<br>Energy                                                                                                                                                                                                                                                                                                                                                                                              |
| GLCM (grey-level co-occurrence matrix) (n=6)           | Homogeneity<br>Energy<br>Contrast<br>Correlation<br>Entropy<br>Dissimilarity                                                                                                                                                                                                                                                                                                                                                           |
| NGLDM (neighborhood grey-level different matrix) (n=3) | Coarseness<br>Contrast<br>Busyness                                                                                                                                                                                                                                                                                                                                                                                                     |
| GLZLM (grey-level zone-length matrix) (n=11)           | SZE (short-zone emphasis)<br>LZE (long-zone emphasis)<br>LGZE (low grey-level zone emphasis)<br>HGZE (high grey-level zone emphasis)<br>SZLGE (short-zone low grey-level emphasis)<br>SZHGE (short-zone high grey-level emphasis)<br>LZLGE (long-zone low grey-level emphasis)<br>LZHGE (long-zone high grey-level emphasis)<br>GLNU (grey-level non-uniformity for zone)<br>ZLNU (zone length non-uniformity)<br>ZP (zone percentage) |

Table S2. Number of discordant cases by age.

| Age (y) | Total | Discordant case |
|---------|-------|-----------------|
| 21-30   | 15    | 2 (13%)         |
| 31-40   | 28    | 3 (11%)         |
| 41-50   | 45    | 7 (16%)         |
| 51-60   | 81    | 12 (15%)        |
| 61-70   | 78    | 11 (14%)        |
| 71-80   | 71    | 17 (24%)        |
| 81-90   | 9     | 3 (33%)         |
| 91-     | 1     | 1 (100%)        |
| Total   | 328   | 56              |
